# Supplementary material for: Linc-RoR promotes MAPK/ERK signaling and confers estrogen-independent growth of breast cancer
Source: Springer Nature journal article supplement (doi:10.1186/s12943-017-0727-3), 2017-10-17
Supplement: MOESM1 [file 15141062]

**Table S1. Primers used in this study**

|                  |                       |
|------------------|-----------------------|
| Linc-RoR-RT-5.1A | TATAATGAGATACCACCTTA  |
| Linc-RoR-RT-3.1A | AGGAACTGTCATACCGTTTC  |
| c-Myc-RT-5.1     | CCTACCCTCTCAACGACAGC  |
| c-Myc-RT-3.1     | CTCTGACCTTTTGCCAGGAG  |
| pS2-RT-5.1       | ttgtggttttcctgggtgtca |
| pS2-RT-3.1       | cggagctctgggactaatca  |
| CXCL12-RT-5.1    | tgagagctcgctttgagtga  |
| CXCL12-RT-3.1    | ggaaatgtcaccttgccaac  |
| Cyclin D1-RT-5.1 | ATGGAACACCAGCTCCTGTG  |
| Cyclin D1-RT-3.1 | ACCTCCAGCATCCAGGTGGC  |

A

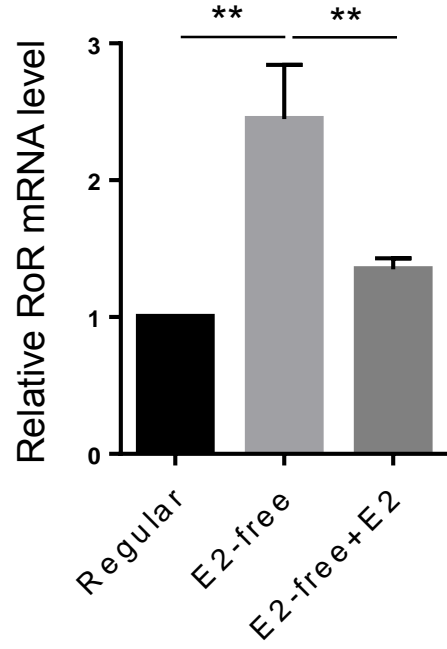

B

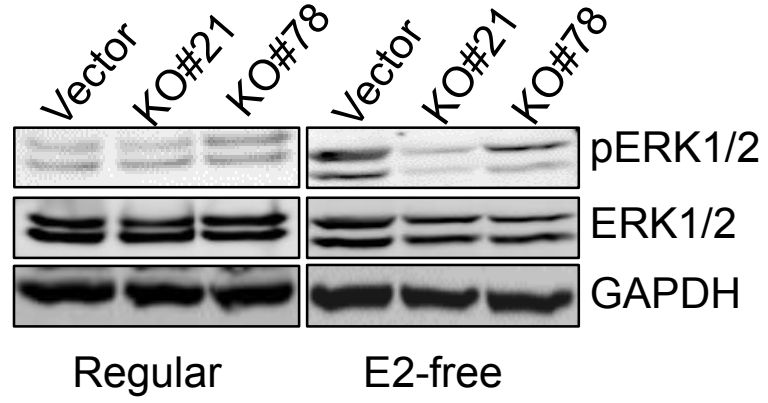

C

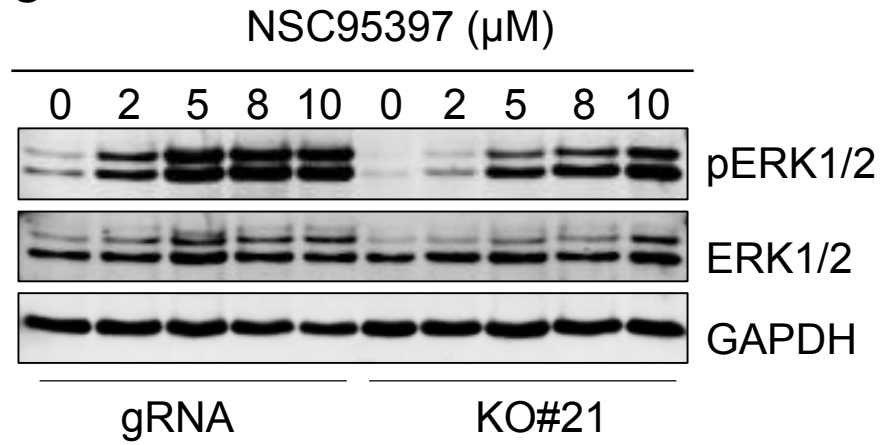

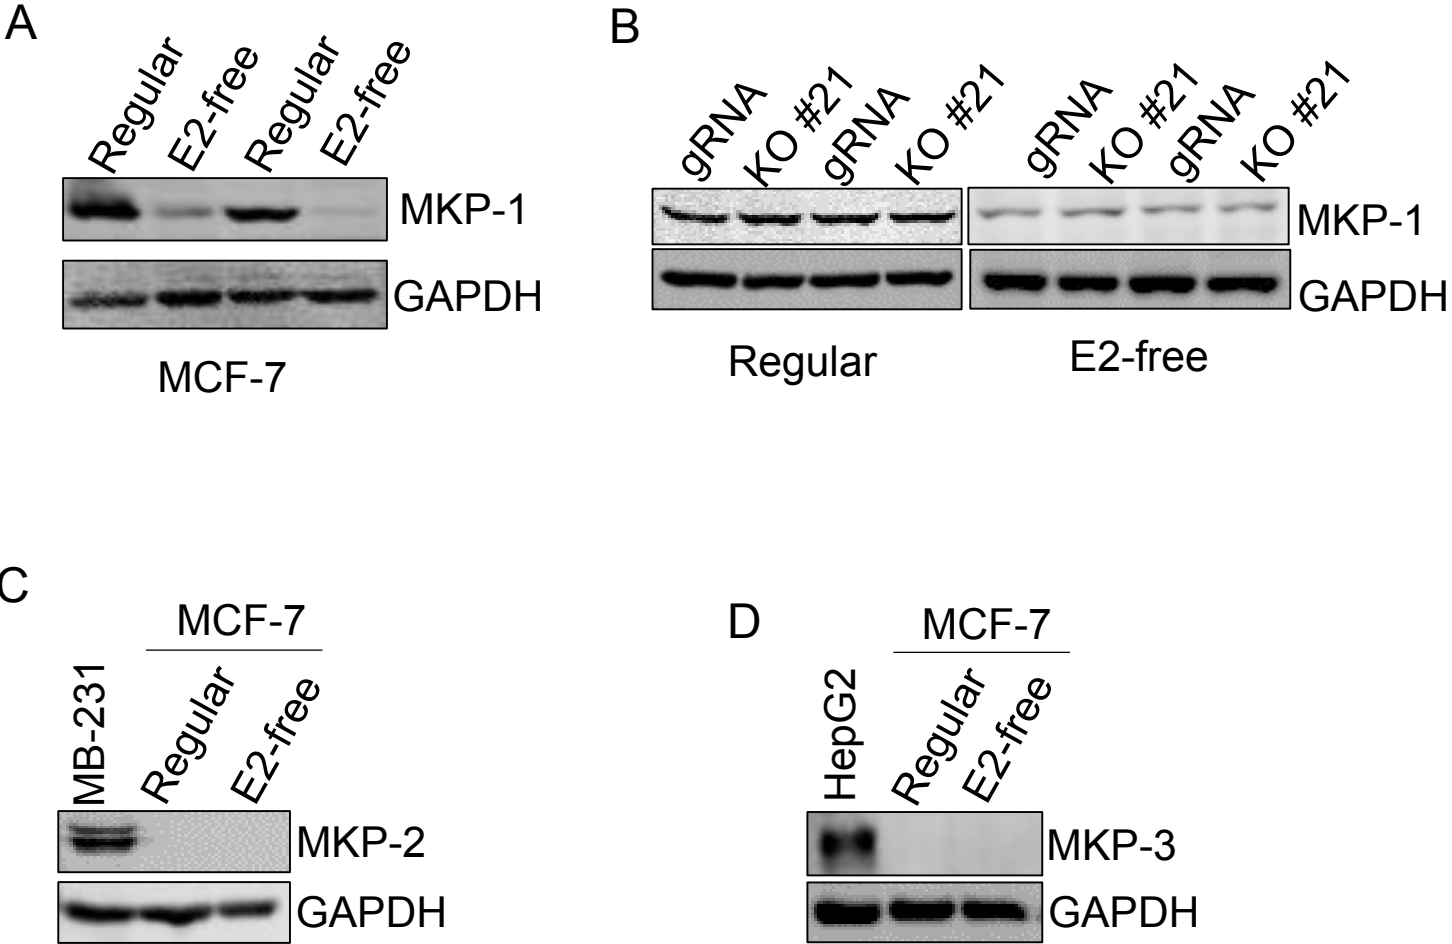

**Figure S1. Expression of linc-RoR and ERK in response to estrogen deprivation.** (A) Linc-RoR is induced by estrogen deprivation, whereas this induction is abrogated by addition of E2. Estrogen deprivation: MCF-7 cells were cultured for 24 h in E2-free medium. (B) Linc-RoR is required for the activation of ERK by estrogen deprivation. (C) Suppression of MKP activity by NSC97397 restores ERK activation both in gRNA and linc-RoR KO cells under E2-free condition.

**Figure S2. Expression of MKP1~3 in MCF-7 cells.** (A) Expression of MKP-1 in MCF-7 cells under regular and E2-free condition. (B) MKP-2 is not detectable in MCF-7 cells in either regular or E2-free medium. MDA-MB-231 cell lysate serves as a positive control per the vendor's datasheet. (C) MKP-3 is not detectable in MCF-7 cells in either regular or E2-free medium. HepG2 cell lysate serves as a positive control per the vendor's datasheet.
